# Supplementary material for: End-selective functionalization of carbon nanotubes. Use of DOE for the optimization of a DNA probe attachment and hybridization using an enzymatic amplifying system
Source: Royal Society of Chemistry journal article supplement (doi:10.1039/b818160h), 2008-12-12
Supplement: b818160h.pdf [file b818160h.pdf]

## End-Selective Functionalization of Carbon Nanotubes. Use of DOE for the Optimization of a DNA Probe Attachment and Hybridization Using an Enzymatic Amplifying System

Maytal Piran, Vadim Kotlyar, Dana Dina Medina, Christophe PirLOT, Diana Goldman, and Jean-Paul Lellouche\* (lellouj@mail.biu.ac.il)

### Electronic Supplementary Information (ESI)

| Category Protocol N° | Total Binding (OD) | Non-Specific Binding (OD) | EF (n° 1) <sup>a</sup> | Pegylated MWCNT <sub>s<sub>ox</sub></sub> : Total Binding (OD) | Pegylated MWCNT <sub>s<sub>ox</sub></sub> : Non-Specific Binding (OD) | EF (n° 2) <sup>b</sup> |
|----------------------|--------------------|---------------------------|------------------------|----------------------------------------------------------------|-----------------------------------------------------------------------|------------------------|
| 8                    | 2.22               | 1.06                      | 1.1                    | 1.04                                                           | 0.03                                                                  | 32.8                   |
| 7                    | 2.11               | 1.30                      | 0.6                    | 1.20                                                           | 0.03                                                                  | 48.0                   |
| 3                    | 2.82               | 1.25                      | 1.3                    | 0.51                                                           | 0.05                                                                  | 9.5                    |
| 5                    | 2.53               | 1.25                      | 1.0                    | 1.09                                                           | 0.04                                                                  | 27.5                   |
| 1                    | 2.68               | 1.43                      | 0.9                    | 1.25                                                           | 0.03                                                                  | 37.0                   |
| 2                    | 2.92               | 1.24                      | 1.4                    | 1.18                                                           | 0.03                                                                  | 36.9                   |
| 6                    | 1.44               | 1.19                      | 0.2                    | 1.04                                                           | 0.03                                                                  | 33.0                   |
| 4                    | 1.80               | 1.28                      | 0.4                    | 1.04                                                           | 0.03                                                                  | 33.0                   |
| Stand. 9             | 3.30               | 2.38                      | 0.4                    | 1.33                                                           | 0.04                                                                  | 34.1                   |

Table ESI-1. OD and EF data for the 1<sup>st</sup> randomly executed set of DOE experiments involving *non-pegylated (a, n° 1)* and *pegylated (b, n° 2)* oxidized MWCNT<sub>s<sub>ox</sub></sub>

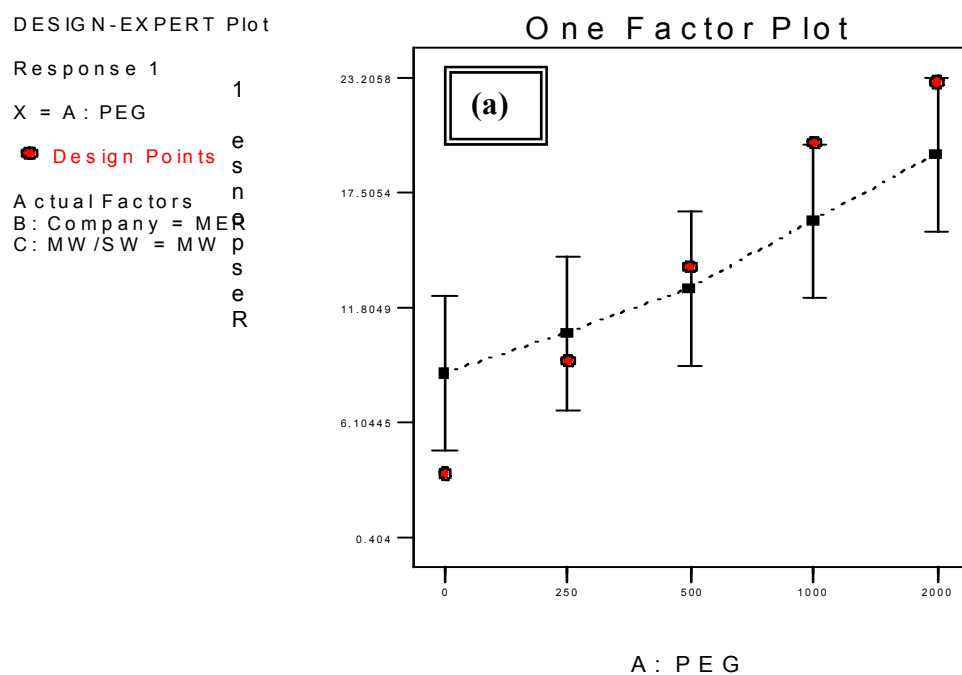

**Figure ESI-1a (One Factor Plot Graph).** Optimal conditions for the oxidative opening of MWCNTs and sidewall PEG-mediated passivation from DOE experiments (influence of the molecular weight of the PEG polymer)

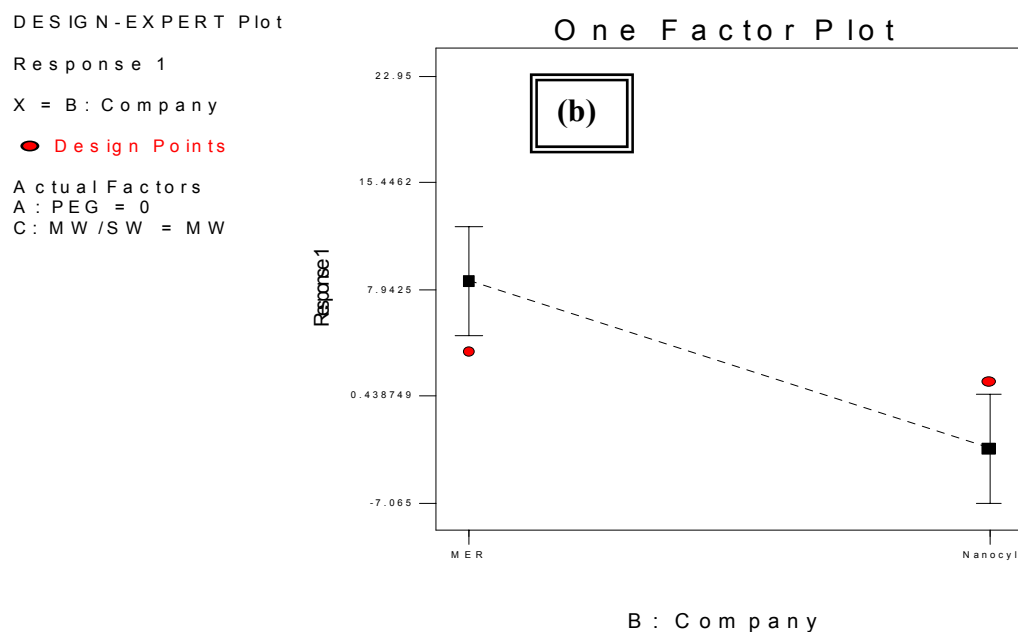

**Figure ESI-2a (One Factor Plot Graph).** Optimal conditions for the oxidative opening of MWCNTs and sidewall PEG-mediated passivation from DOE experiments (influence of the commercial source of MWCNTs/SWCNTs)

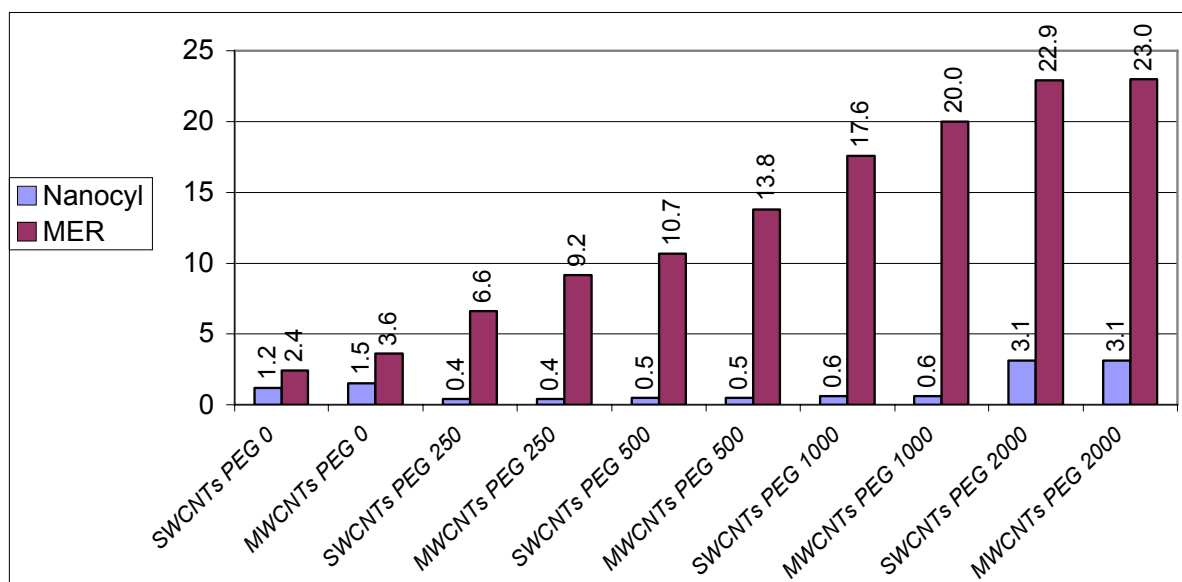

**Figure ESI-2b.** Influence of the commercial source of MWCNTs/SWCNTs (MER Corporation Ltd. and Nanocyl s.a.)

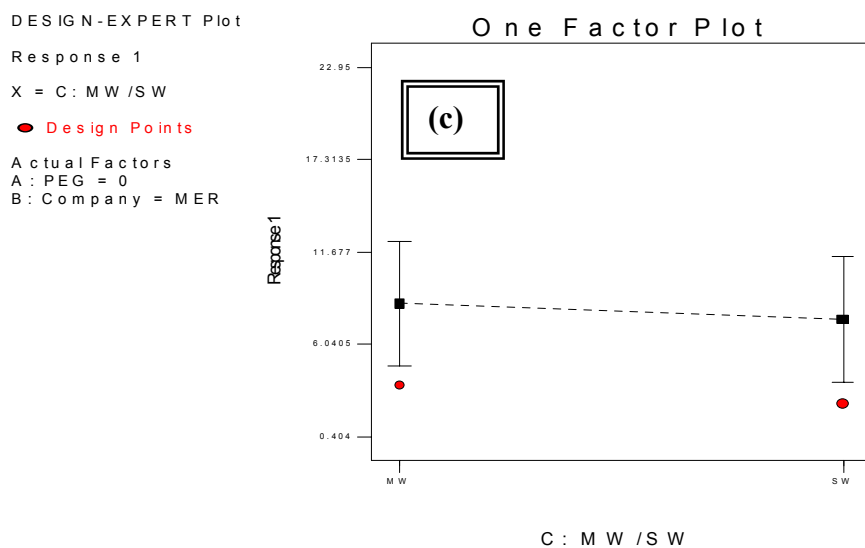

**Figure ESI-3a (One Factor Plot Graph).** Optimal conditions for the oxidative opening of MWCNTs and sidewall PEG-mediated passivation from DOE experiments (influence of the *multi-* or *single*-walled type of starting MWCNTs/SWCNTs)

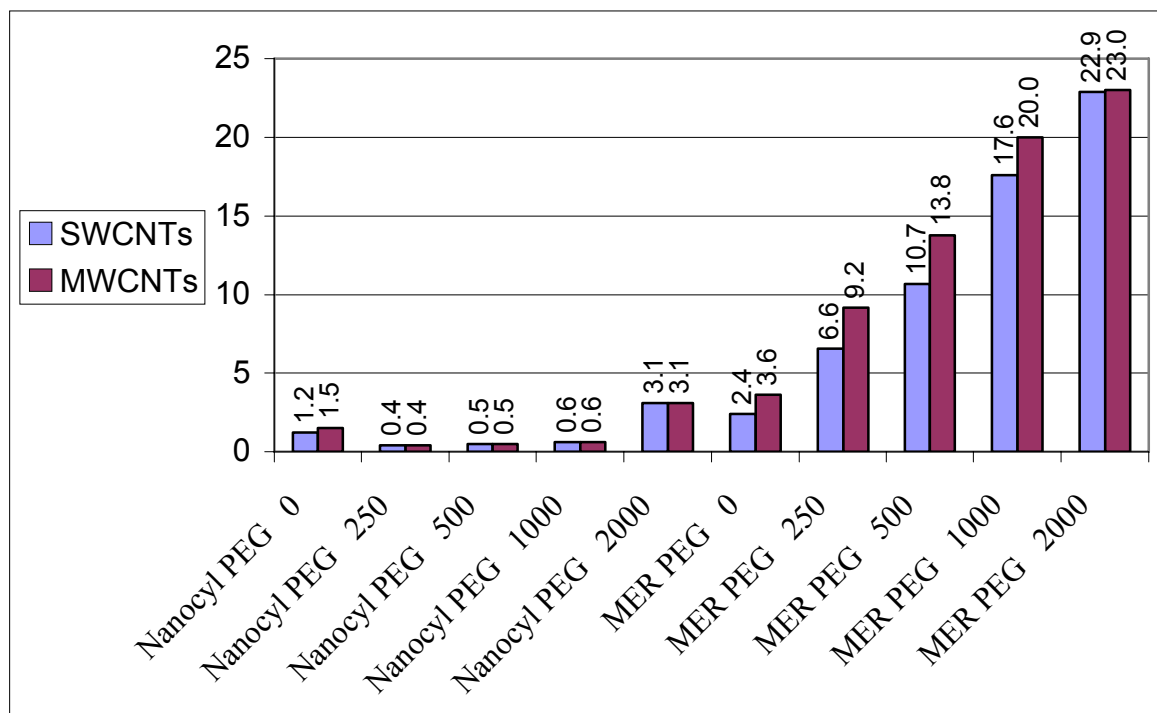

**Figure ESI-3b.** Influence of the *multi-* or *single*-walled type of starting MWCNTs/SWCNTs

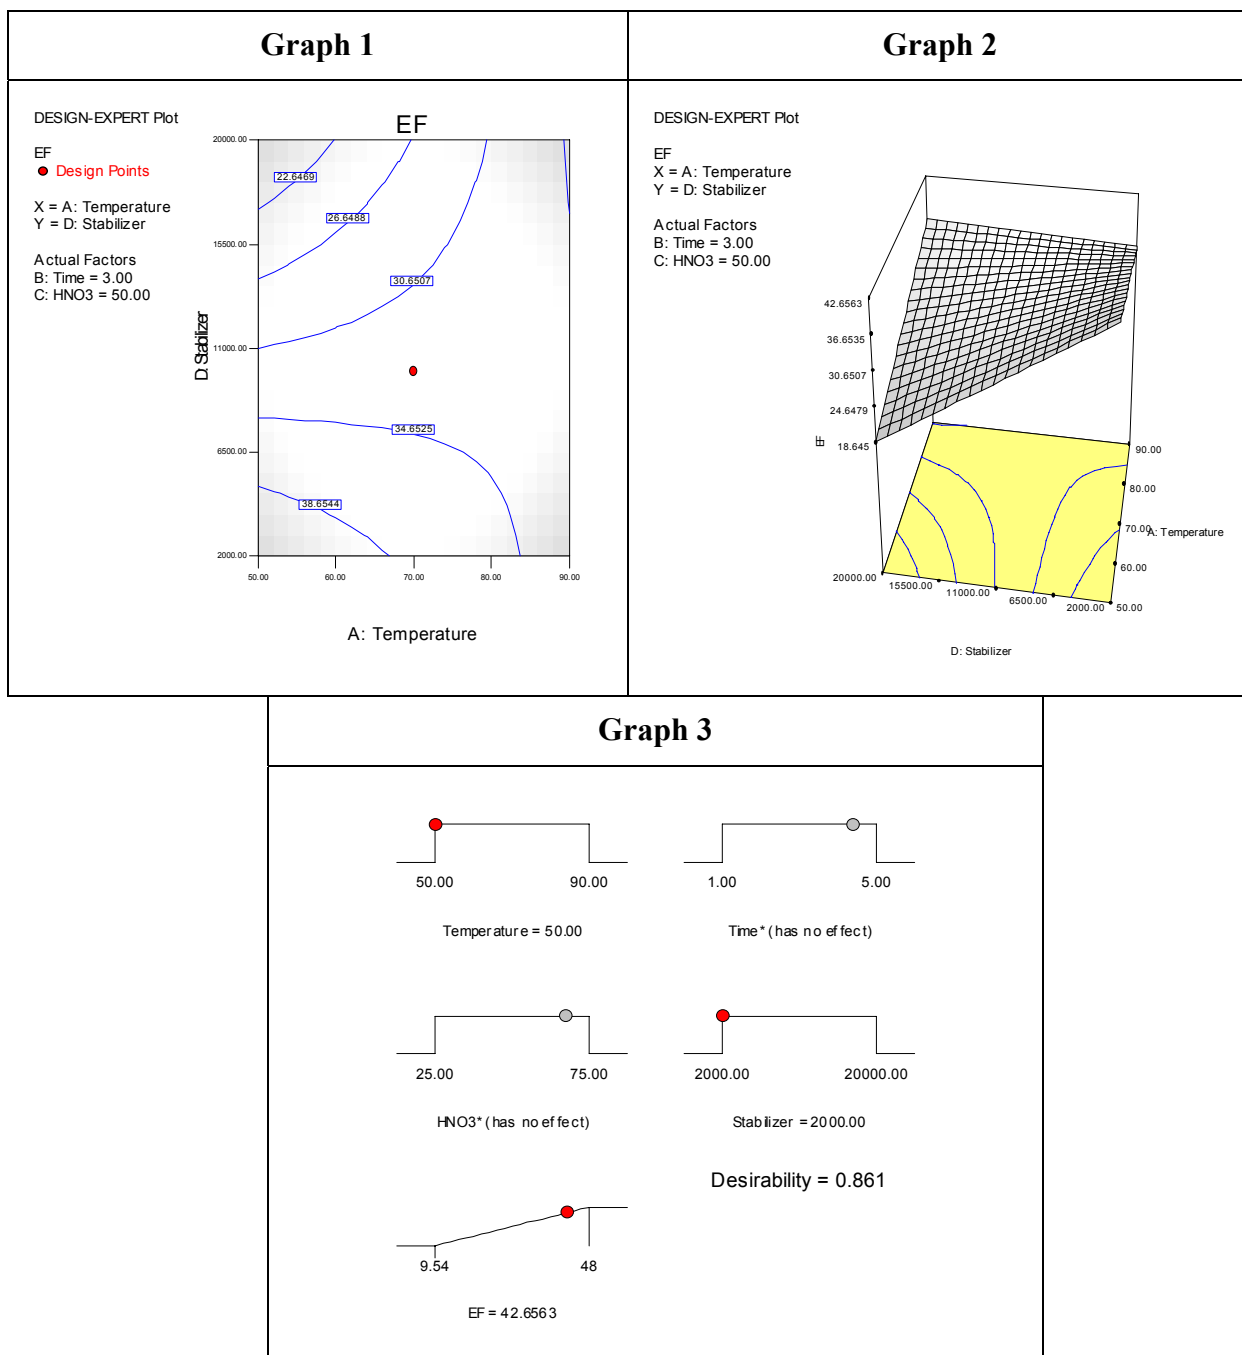

**Figure ESI-4. Graphs 1-3:** Sequence optimization and optimal conditions disclosed from a 1<sup>st</sup> set of DOE experiments using an HRP-amplifying DNA-based hybridization system

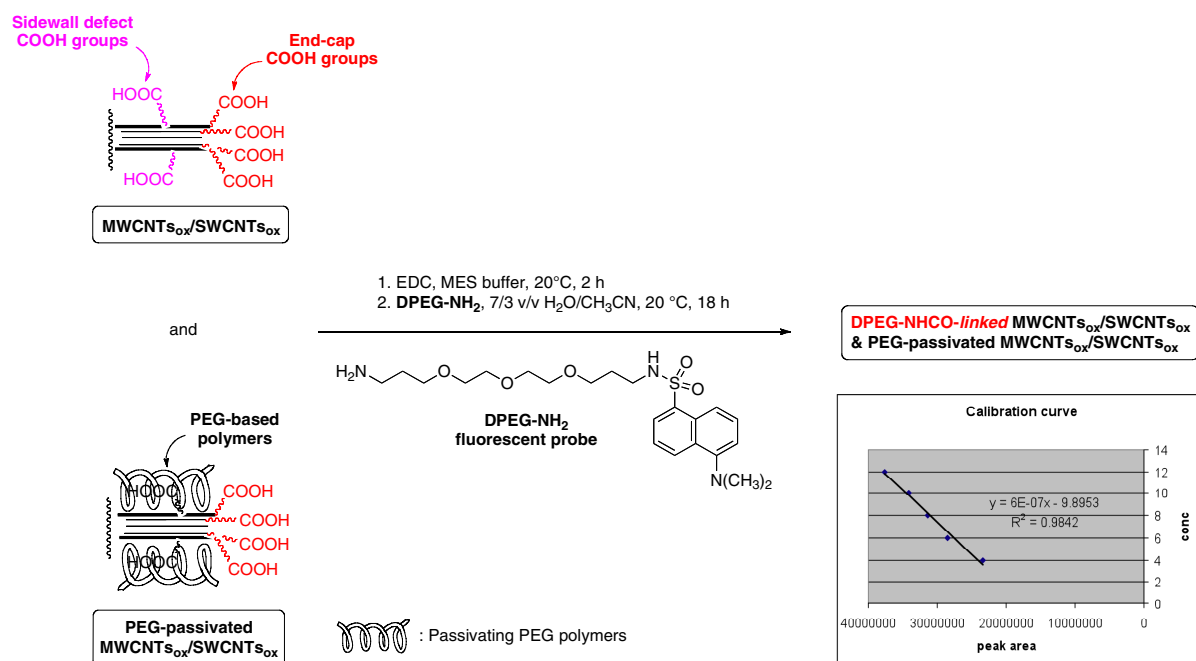

**Scheme ESI-1.** Quantification of accessible end- versus sidewall-localized COOH groups using the EDC-mediated covalent attachment of the fluorescent probe **DPEG-NH<sub>2</sub>**
